# Supplementary material
Source: publisher figshare collection journal article supplement (https://sage.figshare.com/ndownloader/files/17282687)

## **Appendix 1**

### **RMS Anticoagulation Clinic Protocol**

#### **GOALS**

The Queen Alia Heart Institute (QAHI) Anticoagulation Clinic is designed to assist physicians in improving quality of care provided to their patients on anticoagulation therapy. Ultimately, our goal is to assure that these services improve patients' therapeutic outcomes, reduce complications of anticoagulation therapy, and reduce hospitalizations. Specific goals include:

- Improving continuity of care for patients on anticoagulation therapy
- Providing patient education on disease state and drug therapy
- Reducing adverse effects of anticoagulation therapy
- Maximizing the benefits of anticoagulation therapy

#### **DESIGN**

The Queen Alia Heart Institute (QAHI) Anticoagulation Clinic is an outpatient, ambulatory clinic that provides comprehensive care to individuals receiving Anticoagulation drug. The Clinic assesses the effectiveness of Anticoagulation therapy. Patients are assessed by anticoagulation care providers comprised of clinical pharmacists and nutritionists.

## PROCEDURE

### *Referral*

- i. Individuals will fall under the care of the clinic after a physician involved in the care of the patient completes and forwards an "Anticoagulation Clinic Referral" form (form 1). Referrals are only accepted for ambulatory patients able and willing to visit the clinic in person.
- ii. Once received, Referral Forms are immediately reviewed by the pharmacist for appropriateness and completeness and to determine the urgency of the patient's first visit. Missing information will be promptly obtained from patient medical file and the referring physician.
- iii. Patients will be contacted as soon as able to schedule their initial visit.

### **Patient's initial visit**

After reception of a referral form, the patient will be contacted to arrange for their initial visit to take place at the earliest opportunity. During the initial visit, the clinical pharmacist will review the referral and any additional pertinent medical information. This information will be recorded in the patient's profile.

### *Education Session*

Patients will be scheduled for at least one educational visit to occur at the earliest opportunity. The new patient will be provided with information concerning dietary considerations, drug-drug and drug-disease interactions, self-monitoring parameters for symptoms of bleeding/bruising as well as thromboembolisms, compliance to medication via verbal instructions and RMS printed booklet (ATTACHED). The patient will be made aware of clinic hours and contact information.

### *Standard Visit*

At each scheduled appointment, the patient will be interviewed and assessed by the pharmacist for the following current and potential information:

- Signs and symptoms of hemorrhagic or embolic complications
- Changes in dietary habits
- Recent changes in life style or health status
- Status of medical problem necessitating anticoagulation therapy
- Changes in medication regimen including OTC and herbal

preparations

- Compliance issues related to medication regimens
- Confirmation of current anticoagulant regimen

The pharmacist will perform an INR test. The result of the test will be compared to the therapeutic range that is prescribed for the patient. For all INR results greater or equal to 4.5, the patient physician must be directly consulted. Follow-up appointments will be scheduled before the end of the visit. Follow-up should occur no greater than 4 weeks later, but may occur as early as 24 hours.

At the conclusion of the visit, the patient will be given an appointment and the Clinic's phone number. The warfarin booklet will include the patient's INR result and dosage regimen for each visit.

### *Management of INR Values*

#### *i. Initiation of warfarin therapy*

- Start therapy with 2.5-10mg daily taken in the evening. Lower initiation doses are recommended for elderly patients or patients with a potential increased INR response to Warfarin therapy FIGURE 1.
- Follow-up INR will be obtained 3-5 days after initiation of therapy.
- A minimum of a weekly INR will be done for the first 3-4 weeks of therapy to ensure proper dosing.
- Once stable anticoagulation is achieved, maintenance therapy will be managed per the following protocols.

### SCHEDULING FOLLOW-UP PROTIMES

#### TARGET INR 2.0-3.0

| RANGE   | ADJUSTMENT   | FOLLOW-UP    |
|---------|--------------|--------------|
| <2.0    | Per protocol | 1-2 weeks    |
| 2.0-3.0 | No change    | 4-6 weeks    |
| 3.1-4.0 | Per protocol | 1-2 weeks    |
| 4.1-6.0 | Per protocol | 3-7 days     |
| >6.0    | Notify M.D.  | Per protocol |

#### TARGET INR 2.5-3.5

| RANGE   | ADJUSTMENT   | FOLLOW-UP    |
|---------|--------------|--------------|
| <2.5    | Per protocol | 1-2 weeks    |
| 2.5-3.5 | No change    | 4-6 weeks    |
| 3.6-4.5 | Per protocol | 1-2 weeks    |
| 4.6-6.0 | Per protocol | 3-7 days     |
| >6.0    | Notify M.D.  | Per protocol |

## The protocol of altering warfarin dose to achieve target INR

### Altering Coumadin/Warfarin Dosage to Achieve INR of 2 to 3

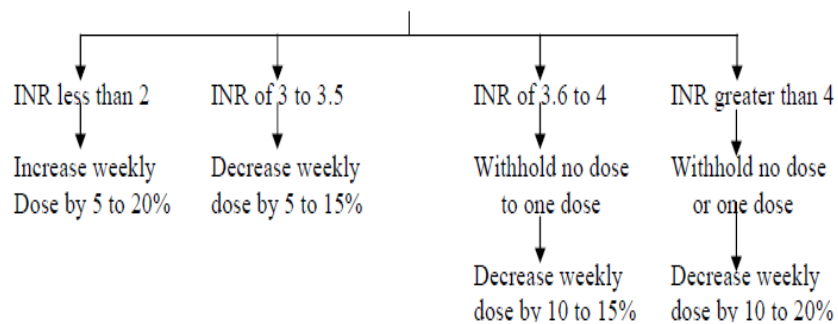

### Altering Coumadin/Warfarin Dosage to Achieve INR of 2.5 to 3.5

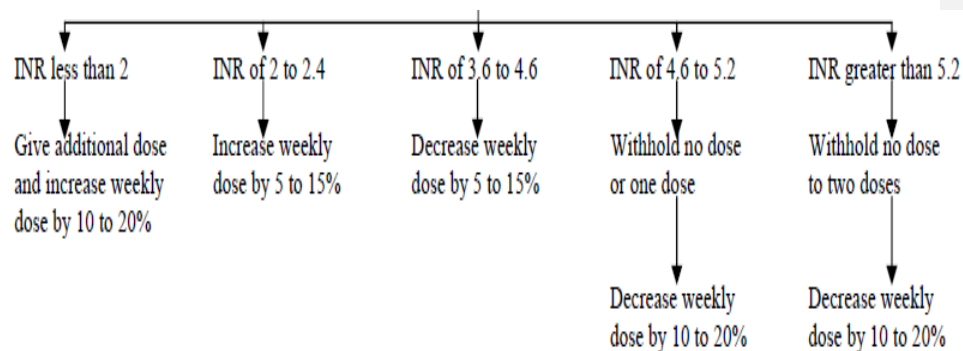

*Dosing adjustment using 5mg tab*

| SUN   | MON     | TUES  | WED     | THUR  | FRI     | SAT   | Total Weekly | % change |
|-------|---------|-------|---------|-------|---------|-------|--------------|----------|
| 1 tab | ½ tab   | 1 tab | ½ tab   | 1 tab | ½ tab   | 1 tab | 27.5mg       | -20%     |
| 1 tab | ½ tab   | 1 tab | 1 tab   | 1 tab | ½ tab   | 1 tab | 30mg         | -15%     |
| 1 tab | ½ tab   | 1 tab | 1 tab   | 1 tab | 1 tab   | 1 tab | 32.5mg       | -5%      |
| 1 tab | 1 tab   | 1 tab | 1 tab   | 1 tab | 1 tab   | 1 tab | 35mg         | 0%       |
| 1 tab | 1 ½ tab | 1 tab | 1 tab   | 1 tab | 1 tab   | 1 tab | 37.5mg       | +5%      |
| 1 tab | 1 ½ tab | 1 tab | 1 tab   | 1 tab | 1 ½ tab | 1 tab | 40mg         | +15%     |
| 1 tab | 1 ½ tab | 1 tab | 1 ½ tab | 1 tab | 1 ½ tab | 1 tab | 42.5mg       | +20%     |

*Scheduling Perioperative Management*

Patient's currently receiving anticoagulation therapy offer unique and difficult therapeutic challenges when needing a percutaneous medical procedure.

Patients should be interviewed at each visit for the possibility of planned percutaneous procedures.

When a medical procedure is pending, a thromboembolic and hemorrhagic risk assessment should be completed and resulting treatment strategies discussed with the patient (APPENDIX 1). When necessary, the patient's primary care provider, surgeon, dentist, gastroenterologist or other physicians as well as the clinic physician should be consulted for final approval of treatment strategies.

**Documentation**

*Patient Profile*

An electronic patient profile will be maintained in the anticoagulation clinic for all patients. Documentation will include

Patient's information (including patient's name, national and medical numbers, insurance level, address and contact numbers)

Indication for anticoagulation therapy

Expected duration of anticoagulant treatment

Target INR

Current anticoagulant dose

Last INR

Referring physician

Relevant clinical information obtained from the patient interview

Instructions given to the patient

Date of follow-up appointment

Pharmacist notes

**Prescriptions**

Prescriptions for warfarin for clinic patients will originate from the clinic and given to patients to dispense from pharmacy.

**Queen Alia Heart Institute**  
**anticoagulation Clinic Referral Form**

**Patient information**

Patient Name: \_\_\_\_\_ Date of Birth: \_\_\_\_\_  
\_\_\_\_\_

Address: \_\_\_\_\_ Phone #: \_\_\_\_\_  
\_\_\_\_\_

.....  
**Anticoagulation History:**

Diagnosis for anticoagulation: \_\_\_\_\_  
\_\_\_\_\_

Current Warfarin dose: \_\_\_\_\_

Date started on Warfarin: \_\_\_\_\_ Expected duration of anticoagulation: \_\_\_\_\_  
\_\_\_\_\_

Last INR result: \_\_\_\_\_ Date: \_\_\_\_\_  
\_\_\_\_\_

**Requested therapeutic range:** (please check one)

☐ **2.0 - 3.0 INR Standard intensity:**

☐ **2.5-3.5 INR High Intensity:**

Recommended for the treatment of:

Recommended for the treatment of:

Venous Thrombosis  
Valves

Mechanical Prosthetic Mitral

Prevention of Systemic Embolism

Recurrent DVT

Acute MI (to prevent systemic embolism)

Recurrent PE

Atrial Fibrillation

Bileaflet Aortic Mechanical Valves

CVA/ TIA

☐ **Other:** \_\_\_\_\_

**INR**

Hypercoagulable state

---

### **Medication Information:**

Is the patient on antiplatelet drugs? ☐ aspirin ☐ clopidogrel ☐ other (please specify)?

\_\_\_\_\_

Is this to continue during anticoagulation? YES/NO

### **Concurrent Drug Therapy:**

\_\_\_\_\_

### **Past Medical History:**

☐ Heart Failure ☐ Liver disease ☐ Diabetes ☐  
IVDA/Alcohol Abuse

☐ Hypothyroid ☐ GI Bleeds or PUD ☐ Seizure Disorder ☐ Cognitive  
Impairment

☐ Hypercoagulable state ☐ Hx of falls ☐ Cancer (type: ) ☐  
Hypertension (BP > 180/110 mmHg)

☐ Cerebral Haemorrhage in the last 6 months ☐ Bleeding Disorder



**Allergies:** \_\_\_\_\_

**Comments on Condition:**

\_\_\_\_\_

**Physician Information**

As attending physician, I request the above patient be followed at QAHI, anticoagulation Clinic for monitoring, dose adjustment and education, per clinic policy. I will respond to critical lab values in a timely manner when contacted by the WC Clinic

\_\_\_\_\_  
Physician signature

\_\_\_\_\_  
Date

\_\_\_\_\_  
Phone

\_\_\_\_\_  
Fax

## Initiation of Warfarin

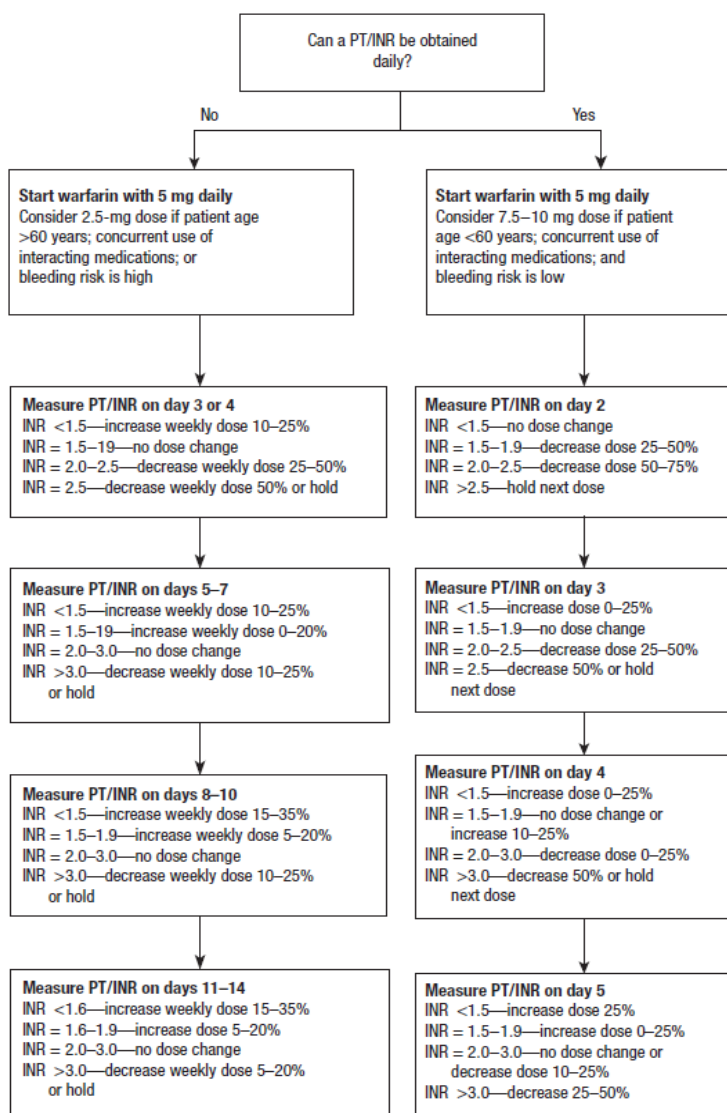

**RMS Printed Booklet**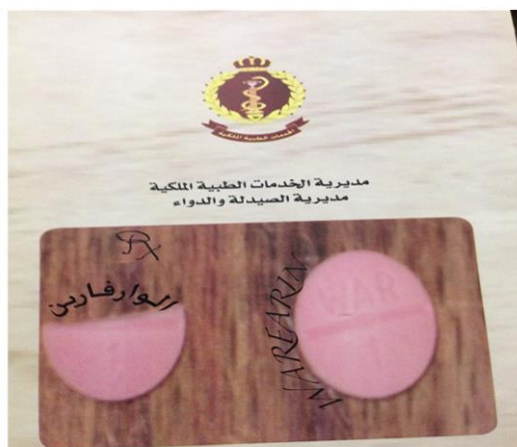

| المتسلسل | التاريخ | الجرعة | INR |
|----------|---------|--------|-----|
| ١        |         |        |     |
| ٢        |         |        |     |
| ٣        |         |        |     |
| ٤        |         |        |     |
| ٥        |         |        |     |
| ٦        |         |        |     |
| ٧        |         |        |     |
| ٨        |         |        |     |
| ٩        |         |        |     |
| ١٠       |         |        |     |
| ١١       |         |        |     |

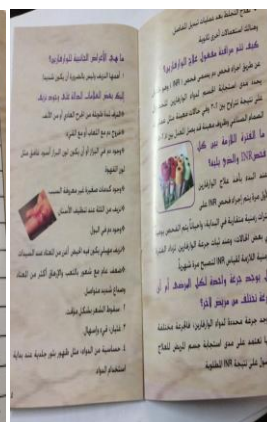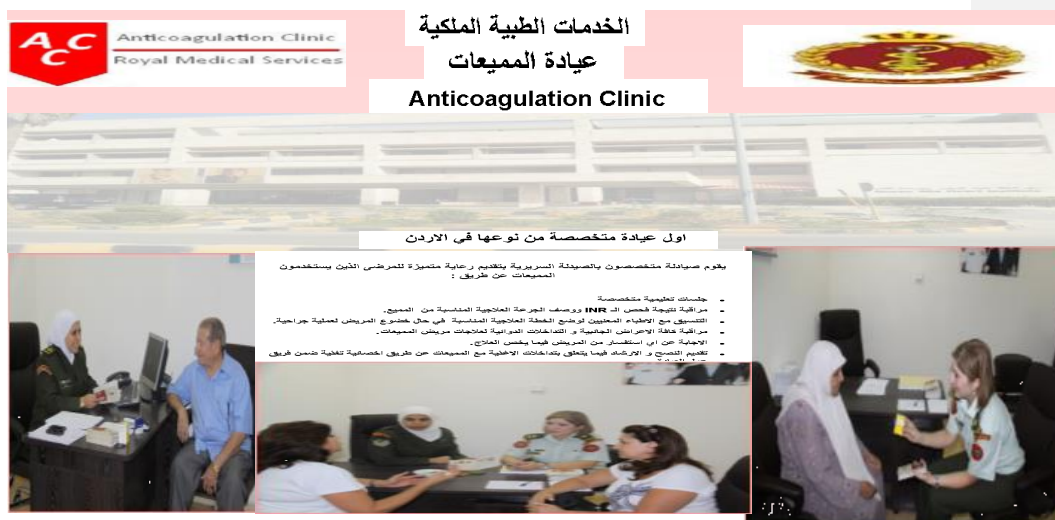

Supplement: Supplementary file 1 [file 17282687]
